# Supplementary material for: Increased bodyweight and inadequate response to aspirin in individuals with coronary artery disease
Source: Springer Nature journal article supplement (doi:10.1007/s11239-019-01830-z), 2019-03-16
Supplement: MOESM1 [file 16553948]

**SUPPLEMENT APPENDIX**

**Enrollment criteria**

| **Dataset 1, stable CAD (n = 164)**  Inclusion criteria  Men or women at least 18 years of age with stable CAD (coronary angioplasty and/or coronary artery bypass graft surgery and/or coronary angiography showing obstruction of at least 50% in one major epicardial vessel) or with a prior admission for ACS  Chronic use of aspirin 100 mg daily  Exclusion criteria  Active bleeding  Prior hemorrhagic stroke  Current DAPT or anticoagulant  CrCL < 50 ml/min  Hematocrit < 30 % or > 50 %  Platelet count < 100,000/mm3 or more than 450,000/mm3  PCI or CABG in the last 6 months |
| --- |
| **Dataset 1, ACS ( n = 204)**  Inclusion  >= 18 years-old  Hospitalization with a diagnosis of ACS and taking DAPT since hospital admission  Exclusion  Hematocrit < 30 % or > 50 %  Platelet count < 100,000/mm3 or more than 450,000/mm3 |
| **Dataset 2 (n = 70)**  Inclusion  Stable CAD defined as previous MI, coronary artery bypass graft (CABG) surgery, PCI, or coronary angiography showing stenosis of at least 50 % of the diameter in one or more epicardial vessels; age >= 18 years; and chronic use of aspirin 100 mg daily  Exclusion  Active bleeding; women of childbearing potential; use of PPI or H2-receptor blocker within  the last week before inclusion; hematocrit \30 % or [50 %; platelet count \100,000/ll or [500,000/ll; creatinine clearance \50 mL/min; PCI with bare metal stents (BMS) in the last 30 days or in the last year, in the case of drug-eluting stents (DES); CABG surgery in the last 90 days; ACS in the last 60 days; active malignant neoplasm; active peptic ulcer disease in the last 60 days; prior gastrointestinal (GI) bleeding |

**Supplement Table 1A** – Weight in kg and baseline characteristics for dataset 1 (n = 368)

|  | Weight | P |
| --- | --- | --- |
| Female | 68.9 ± 14.8 | < 0.001 |
| Males | 78.4 ± 15.4 |
| Age ≥ 65 years-old | 71.6 ± 13.0 | < 0.001 |
| Age < 65 years-old | 79.0 ± 17.3 |
| DM | 79.9 ± 16.6 | < 0.001 |
| No DM | 72.7 ± 14.6 |
| Smoking | 72.6 ± 14.7 | 0.065 |
| No smoking | 76.3 ± 16.0 |
| Hypertension | 76.0 ± 16.2 | 0.39 |
| No hypertension | 74.3 ± 14.5 |
| Dyslipidemia | 76.7 ± 15.7 | 0.056 |
| No dyslipidemia | 73.3 ± 15.9 |

**Supplement Table 1B** – Body mass index (BMI) in kg/m2 and baseline characteristics for dataset 1 (n = 362)

|  | BMI | P |
| --- | --- | --- |
| Female | 27.5 ± 5.3 | 0.69 |
| Males | 27.3 ± 4.8 |
| Age ≥ 65 years-old | 26.6 ± 4.3 | 0.005 |
| Age < 65 years-old | 28.0 ± 5.3 |
| DM | 29.0 ± 5.3 | < 0.001 |
| No DM | 26.2 ± 4.3 |
| Smoking | 25.9 ± 4.7 | 0.005 |
| No smoking | 27.7 ± 4.9 |
| Hypertension | 27.8 ± 5.0 | 0.004 |
| No hypertension | 26.0 ± 4.5 |
| Dyslipidemia | 27.9 ± 4.8 | 0.001 |
| No dyslipidemia | 26.2 ± 5.0 |

6 patients had missing information regarding height and BMI

**Supplement Table 2A** – Weight in kg and baseline characteristics for dataset 2 (n = 70)

|  | Weight | P |
| --- | --- | --- |
| Female | 64.7 ± 14.5 | < 0.001 |
| Males | 82.3 ± 16.1 |
| Age ≥ 65 years-old | 74.3 ± 19.1 | 0.29 |
| Age < 65 years-old | 78.8 ± 16.2 |
| DM | 78.1 ± 18.5 | 0.53 |
| No DM | 75.5 ± 16.8 |
| Smoking | 73.8 ± 11.7 | 0.50 |
| No smoking | 77.5 ± 18.7 |
| Hypertension | 75.1 ± 17.6 | 0.21 |
| No hypertension | 81.0 ± 17.2 |
| Dyslipidemia | 76.9 ± 19.5 | 0.96 |
| No dyslipidemia | 76.6 ± 13.9 |

**Supplement Table 2B** – BMI and baseline characteristics for dataset 2 (n = 70)

|  | BMI | P |
| --- | --- | --- |
| Female | 27.6 ± 5.1 | 0.28 |
| Males | 28.9 ± 4.5 |
| Age ≥ 65 years-old | 27.6 ± 5.2 | 0.17 |
| Age < 65 years-old | 29.2 ± 4.2 |
| DM | 29.3 ± 5.0 | 0.14 |
| No DM | 27.6 ± 4.2 |
| Smoking | 28.4 ± 4.5 | 0.96 |
| No smoking | 28.5 ± 4.8 |
| Hypertension | 28.4 ± 4.8 | 0.81 |
| No hypertension | 28.7 ± 4.3 |
| Dyslipidemia | 28.5 ± 5.1 | 0.87 |
| No dyslipidemia | 28.3 ± 3.8 |

**Supplement Table 3-A**  – Association between weight (in kg), body mass index (in kg/m2) and height (in cm) and high on-treatment platelet reactivity (HPR) to arachidonic acid in dataset 1 (n = 368)

| Variable | OR (unadjusted) | P-value (unadjusted) | OR (adjusted) | P-value (adjusted) |
| --- | --- | --- | --- | --- |
| Weight (for every 10 kg) | 1.15 (95 % CI 1.00 to 1.33) | 0.048 | 1.23 (95 % CI 1.06 to 1.42) | 0.007 |
| BMI (for every 5 kg/m2) | 1.38 (95 % CI 1.10 to 1.74) | 0.006 | 1.43 (95 % CI 1.13 to 1.81) | 0.003 |
| Height (for every 10 cm) | 0.99 (95 % CI 0.97 to 1.02) | 0.66 | 0.99 (95 % CI 0.97 to 1.03) | 0.84 |

6 patients had missing information regarding height and BMI

Adjusted for: age, sex, diabetes, hypertension, smoking and dyslipidemia

Supplement Table 3B – Association between weight (in kg), body mass index (in kg/m2) and height (in cm) and high on-treatment platelet reactivity (HPR) to arachidonic acid in dataset 1 stratified according to stable CAD ( n = 164) or ACS (n = 204) phenotypes

|  | Stratum | OR (unadjusted) | P-value (unadjusted) | OR (adjusted) | P-value (adjusted) | P-interaction |
| --- | --- | --- | --- | --- | --- | --- |
| Weight (for every 10 kg) | Stable CAD | 1.16 (95 % CI 0.94 to 1.43) | 0.16 | 1.22 (95 % CI 0.97 to 1.54) | 0.088 | 0.95 |
| ACS | 1.13 (95 % CI 0.91 to 1.42) | 0.25 | 1.21 (95 % CI 0.93 to 1.57) | 0.15 |
| BMI (for every 5 kg/m2) | Stable CAD | 1.32 (95 % CI 0.95 to 1.85) | 0.102 | 1.44 (95 % CI 1.00 to 2.06) | 0.049 | 0.82 |
| ACS | 1.33 (95 % CI 0.94 to 1.89) | 0.11 | 1.38 (95 % CI 0.92 to 2.06) | 0.12 |
| Height (for every 10 cm) | Stable CAD | 1.00 (95 % CI 0.97 to 1.04) | 0.91 | 1.00 (95 % CI 0.96 to 1.05) | 0.72 | 0.51 |
| ACS | 0.98 (95 % CI 0.94 to 1.02) | 0.41 | 0.99 (95 % CI 0.94 to 1.04) | 0.71 |

6 patients had missing information regarding height and BMI; ACS = acute coronary syndrome; CAD = coronary artery disease

Adjusted for: age, sex, diabetes, hypertension, smoking and dyslipidemia

In a model that included time from first in-hospital aspirin dose as a covariate in ACS patients, adjusted OR (95% CI) were: 1.22 (0.91 to 1.63) for weight (for every 10 kg); 1.35 (0.87 to 2.10) for BMI (for every kg/m2); and 1.03 (0.58 to 1.83) for height (for every 10 cm)

**Supplement Table 4** – Association between weight (in kg), body mass index (in kg/m2) and height (in cm) and serum thromboxane B2 (TXB2) dosage

| Variable | Increase in TXB2 (unadjusted) | P-value (unadjusted) | Increase in TXB2 (adjusted) | P-value (adjusted) |
| --- | --- | --- | --- | --- |
| Weight (for every 10 kg) | 3.67 (95 % CI -5.02 to 12.37) | 0.40 | 6.74 ( 95 % CI - 3.64 to 17.11) | 0.20 |
| BMI (for every 5 kg/m2) | 10.24 (95 % CI -5.99 to 26.47) | 0.21 | 10.14 ( 95 % CI -7.17 to 27.45) | 0.25 |
| Height (for every 10 cm) | 0.31 (95 % CI -14.81 to 15.44) | 0.97 | 12.23 ( 95 % CI -10.70 to 35.16) | 0.29 |

Adjusted for: age, sex, diabetes, hypertension, smoking and dyslipidemia
